# Supplementary material
Source: HighWire-hosted journal article supplement (https://bmjopen.bmj.com/content/12/10/e060952)
Supplement: inline-supplementary-material-1 [file inline-supplementary-material-1.pdf]

## Searching Strategy of MEDLINE (Ovid)

The following searches were performed in May, 2022.

| Keywords               | Steps | Search                                                   | Results |
|------------------------|-------|----------------------------------------------------------|---------|
| International Students | 1     | exp International Educational Exchange/ or exp Students/ | 157249  |
|                        | 2     | international student*.mp.                               | 1008    |
|                        | 3     | foreign student*.mp.                                     | 309     |
|                        | 4     | overseas student*.mp.                                    | 87      |
|                        | 5     | student* abroad.mp.                                      | 41      |
|                        | 6     | ethnic student*.mp.                                      | 35      |
|                        | 7     | sojourner*.mp.                                           | 169     |
|                        | 8     | transnational migrant*.mp.                               | 32      |
|                        | 9     | Migrant student*.mp.                                     | 38      |
|                        | 10    | Student mobility.mp.                                     | 64      |
|                        | 11    | 1 or 2 or 3 or 4 or 5 or 6 or 7 or 8 or 9 or 10          | 158122  |
| Food insecurity        | 12    | exp food insecurity/ or exp access to healthy foods/     | 935     |
|                        | 13    | food insecurity.mp.                                      | 6193    |
|                        | 14    | food security.mp.                                        | 10431   |
|                        | 15    | food access.mp.                                          | 1242    |
|                        | 16    | food availability.mp.                                    | 4438    |
|                        | 17    | food stability.mp.                                       | 42      |
|                        | 18    | Food utili*ation.mp.                                     | 452     |
|                        | 19    | Hunger.mp.                                               | 13203   |
|                        | 20    | Ethnic food.mp.                                          | 61      |
|                        | 21    | food supply.mp.                                          | 18819   |
|                        | 22    | food accessibility.mp.                                   | 139     |
|                        | 23    | cultural food.mp.                                        | 94      |
|                        | 24    | food quality.mp.                                         | 7103    |
|                        | 25    | food quantity.mp.                                        | 249     |
|                        | 26    | food poverty.mp.                                         | 90      |
|                        | 27    | food scarcity.mp.                                        | 318     |
|                        | 28    | food loss.mp.                                            | 186     |
|                        | 29    | loss of food.mp.                                         | 438     |
|                        | 30    | access to food.mp.                                       | 2431    |
|                        | 31    | food instability.mp.                                     | 5       |
|                        | 32    | food insufficiency.mp.                                   | 176     |
|                        | 33    | food desert.mp.                                          | 165     |
|                        | 34    | food swamp.mp.                                           | 20      |
|                        | 35    | food apartheid.mp.                                       | 0       |
|                        | 36    | food hardship.mp.                                        | 18      |
|                        | 37    | food sovereignty.mp.                                     | 118     |

|    |                                                                                                                                                                                                                                                 |       |
|----|-------------------------------------------------------------------------------------------------------------------------------------------------------------------------------------------------------------------------------------------------|-------|
| 38 | food capacity.mp.                                                                                                                                                                                                                               | 5     |
| 39 | "food use".mp.                                                                                                                                                                                                                                  | 418   |
| 40 | cuisine.mp.                                                                                                                                                                                                                                     | 796   |
| 41 | foodways.mp.                                                                                                                                                                                                                                    | 83    |
| 42 | foodscape.mp.                                                                                                                                                                                                                                   | 54    |
| 43 | regional food.mp.                                                                                                                                                                                                                               | 161   |
| 44 | traditional food.mp.                                                                                                                                                                                                                            | 1090  |
| 45 | national dish.mp.                                                                                                                                                                                                                               | 4     |
| 46 | food shed.mp.                                                                                                                                                                                                                                   | 2     |
| 47 | country food.mp.                                                                                                                                                                                                                                | 80    |
| 48 | culturally appropriate food*.mp.                                                                                                                                                                                                                | 39    |
| 49 | culturally acceptable food*.mp.                                                                                                                                                                                                                 | 19    |
| 50 | culturally accepted food*.mp.                                                                                                                                                                                                                   | 4     |
| 51 | culturally preferred food*.mp.                                                                                                                                                                                                                  | 3     |
| 52 | culturally satisfying food*.mp.                                                                                                                                                                                                                 | 0     |
| 53 | preference of food*.mp.                                                                                                                                                                                                                         | 260   |
| 54 | food system*.mp.                                                                                                                                                                                                                                | 3582  |
| 55 | food practice*.mp.                                                                                                                                                                                                                              | 384   |
| 56 | food procurement*.mp.                                                                                                                                                                                                                           | 166   |
| 57 | food preparation*.mp.                                                                                                                                                                                                                           | 2294  |
| 58 | food knowledge*.mp.                                                                                                                                                                                                                             | 175   |
| 59 | traditional food*.mp.                                                                                                                                                                                                                           | 1645  |
| 60 | indigenous food*.mp.                                                                                                                                                                                                                            | 163   |
| 61 | native food*.mp.                                                                                                                                                                                                                                | 111   |
| 62 | food culture*.mp.                                                                                                                                                                                                                               | 378   |
| 63 | culinary heritage*.mp.                                                                                                                                                                                                                          | 9     |
| 64 | food choice*.mp.                                                                                                                                                                                                                                | 5766  |
| 65 | dietary choice*.mp.                                                                                                                                                                                                                             | 1053  |
| 66 | dietary acculturation.mp.                                                                                                                                                                                                                       | 108   |
| 67 | traditional diet*.mp.                                                                                                                                                                                                                           | 1099  |
| 68 | traditional eating.mp.                                                                                                                                                                                                                          | 63    |
| 69 | food allocation*.mp.                                                                                                                                                                                                                            | 68    |
| 70 | food adequacy.mp.                                                                                                                                                                                                                               | 10    |
| 71 | adequate food*.mp.                                                                                                                                                                                                                              | 550   |
| 72 | nutritional adequacy.mp.                                                                                                                                                                                                                        | 786   |
| 73 | emergency food*.mp.                                                                                                                                                                                                                             | 203   |
| 74 | Food stress.mp.                                                                                                                                                                                                                                 | 126   |
| 75 | Food hardship*.mp.                                                                                                                                                                                                                              | 21    |
| 76 | 12 or 13 or 14 or 15 or 16 or 17 or 18 or 19 or 20 or 21 or 22 or 23 or 24 or 25 or 26 or 27 or 28 or 29 or 30 or 31 or 32 or 33 or 34 or 35 or 36 or 37 or 38 or 39 or 40 or 41 or 42 or 43 or 44 or 45 or 46 or 47 or 48 or 49 or 50 or 51 or | 70424 |

|                          |                                                                                                 |                                                                                                                                              |         |
|--------------------------|-------------------------------------------------------------------------------------------------|----------------------------------------------------------------------------------------------------------------------------------------------|---------|
|                          |                                                                                                 | 52 or 53 or 54 or 55 or 56 or 57 or 58 or 59 or 60 or 61 or 62 or 63 or 64 or 65 or 66 or 67 or 68 or 69 or 70 or 71 or 72 or 73 or 74 or 75 |         |
| Post-Secondary Education | 77                                                                                              | Post-secondary education.mp.                                                                                                                 | 502     |
|                          | 78                                                                                              | Universit*.mp.                                                                                                                               | 461892  |
|                          | 79                                                                                              | College*.mp.                                                                                                                                 | 136524  |
|                          | 80                                                                                              | Polytechnic*.mp.                                                                                                                             | 610     |
|                          | 81                                                                                              | Campus*.mp.                                                                                                                                  | 12199   |
|                          | 82                                                                                              | Higher education*.mp.                                                                                                                        | 20262   |
|                          | 83                                                                                              | tertiary education*.mp.                                                                                                                      | 1534    |
|                          | 84                                                                                              | third-level.mp.                                                                                                                              | 1873    |
|                          | 85                                                                                              | third-stage.mp.                                                                                                                              | 5655    |
|                          | 86                                                                                              | graduate.mp.                                                                                                                                 | 70932   |
|                          | 87                                                                                              | undergraduate.mp.                                                                                                                            | 60815   |
|                          | 88                                                                                              | trade school*.mp.                                                                                                                            | 99      |
|                          | 89                                                                                              | technological universit*.mp.                                                                                                                 | 74      |
|                          | 90                                                                                              | vocational school*.mp.                                                                                                                       | 644     |
|                          | 91                                                                                              | technical school*.mp.                                                                                                                        | 354     |
| 92                       | vocational college*.mp.                                                                         | 66                                                                                                                                           |         |
| 93                       | 77 or 78 or 79 or 80 or 81 or 82 or 83 or 84 or 85 or 86 or 87 or 88 or 89 or 90 or 91 or 92    | 685285                                                                                                                                       |         |
| Intervention             | 94                                                                                              | intervention*.mp.                                                                                                                            | 1246971 |
|                          | 95                                                                                              | Food bank*.mp.                                                                                                                               | 301     |
|                          | 96                                                                                              | Food assistance.mp.                                                                                                                          | 2029    |
|                          | 97                                                                                              | Food stamp*.mp.                                                                                                                              | 390     |
|                          | 98                                                                                              | food pantry.mp.                                                                                                                              | 175     |
|                          | 99                                                                                              | food shel*.mp.                                                                                                                               | 273     |
|                          | 100                                                                                             | nutrition education*.mp.                                                                                                                     | 5499    |
|                          | 101                                                                                             | (Special Supplemental Nutrition Program for Women, Infants, and Children).mp.                                                                | 757     |
|                          | 102                                                                                             | Supplemental Nutrition Assistance Program.mp.                                                                                                | 652     |
|                          | 103                                                                                             | Electronic Benefits Transfer.mp.                                                                                                             | 17      |
|                          | 104                                                                                             | The Emergency Food Assistance Program.mp.                                                                                                    | 4       |
|                          | 105                                                                                             | soup kitchen.mp.                                                                                                                             | 48      |
|                          | 106                                                                                             | mobile pantry.mp.                                                                                                                            | 2       |
|                          | 107                                                                                             | mobile food*.mp.                                                                                                                             | 92      |
| 108                      | food deliver*.mp.                                                                               | 896                                                                                                                                          |         |
| 109                      | 94 or 95 or 96 or 97 or 98 or 99 or 100 or 101 or 102 or 103 or 104 or 105 or 106 or 107 or 108 | 1253717                                                                                                                                      |         |
| Final                    | 110                                                                                             | 11 and 76 and 93 and 109                                                                                                                     | 158     |
